# Supplementary material
Source: Research Square preprint supplement (doi:10.21203/rs.3.rs-9226681/v1)
Supplement: Supplementary file 1 [file 3a73d5eda850e0a3585f57cf.docx]

| **Parameters** | **n** | | **Mechanical alignment** | **n** | | **Functional alignment** | | **p-value** | |
| --- | --- | --- | --- | --- | --- | --- | --- | --- | --- |
| ***VAS*** |  | |  |  | |  | |  | |
| *Pre-operative* | 85 | | 6.3+/-1.8 | 82 | | 6.0+/-1.9 | | 0.22 | |
| *1 year’s PO* | 86 | | 1.5+/-2.3 | 86 | | 1.4+/-2.2 | | 0.69 | |
| *Delta* | 85 | | -4.8+/-2.7 | 82 | | -4.6+/-2.5 | | 0.54 | |
| ***SF12 mental score*** |  |  |  | |  | |  | |  | |
| *Pre-operative* |  | 84 | 43.5+/-10.7 | | 79 | | 43.0+/-12.6 | | 0.64 | |
| *1 year’s PO* |  | 68 | 48.0+/-10.3 | | 66 | | 50.5+/-9.6 | | 0.16 | |
| *Delta* |  | 67 | 3.2+/-10.5 | | 61 | | 5.0+/-11.1 | | 0.41 | |
| ***SF12 physical score*** |  |  |  | |  | |  | |  | |
| *Pre-operative* |  | 84 | 32.6+/-6.3 | | 79 | | 34.0+/-8.3 | | 0.45 | |
| *1 year’s PO* |  | 68 | 40.5+/-8.8 | | 66 | | 42.5+/-9.3 | | 0.19 | |
| *Delta* |  | 67 | 7.9+/-9.0 | | 61 | | 8.09+/-12.1 | | 0.32 | |
| ***Pain subscale of WOMAC*** |  |  |  | |  | |  | |  | |
| *Pre-operative* |  | 84 | 40.5+/-17 | | 83 | | 42.7+/-19.9 | | 0.51 | |
| *1 year’s PO* |  | 69 | 78.0+/-17.7 | | 66 | | 79.9+/-20.0 | | 0.28 | |
| *Delta* |  | 69 | 39.7+/-21.8 | | 64 | | 36.6+/-22.5 | | 0.84 | |
| ***Function subscale of WOMAC*** |  |  |  | |  | |  | |  | |
| *Pre-operative* |  | 83 | 43.3+/-18.1 | | 82 | | 46.8+/-20.6 | | 0.91 | |
| *1 year’s PO* |  | 70 | 78.2+/-17.1 | | 66 | | 76.7+/-18.7 | | 0.75 | |
| *Delta* |  | 69 | 30.5+/-18.9 | | 62 | | 29.6+/-22.7 | | 0.88 | |
| ***Oxford knee score*** |  |  |  | |  | |  | |  | |
| *Pre-operative* |  | 46 | 20.7+/-8.0 | | 82 | | 21.2+/-8.2 | | 0.72 | |
| *1 year’s PO* |  | 51 | 35.9+/-7.9 | | 62 | | 36.3+/-9.0 | | 0.53 | |
| *Delta* |  | 37 | 14.1+/-10.7 | | 58 | | 14.3+/-9.1 | | 1.00 | |
| ***Function subscale of Oxford knee score*** |  |  |  | |  | |  | |  | |
| *Pre-operative* |  | 47 | 46.2+/-18.3 | | 84 | | 47.4+/-19.3 | | 0.76 | |
| *1 year’s PO* |  | 52 | 72.2+/-16.1 | | 62 | | 74.3+/-19.7 | | 0.33 | |
| *Delta* |  | 39 | 23.5+/-18.8 | | 60 | | 25.3+/-19.2 | | 0.82 | |
| ***Pain subscale of Oxford knee score*** |  |  |  | |  | |  | |  | |
| *Pre-operative* |  | 46 | 41.1+/-18.1 | | 82 | | 41.9+/-17.5 | | 0.66 | |
| *1 year’s PO* |  | 52 | 76.8+/-18.8 | | 63 | | 77.0+/-19.7 | | 0.78 | |
| *Delta* |  | 38 | 33.2+/-26.0 | | 59 | | 33.1+/-20.6 | | 0.98 | |
| ***Forgotten Joint score*** |  |  |  | |  | |  | |  | |
| *Pre-operative* |  | - | - | | - | | - | | - | |
| *1 year’s PO* |  | 61 | 82.4+/-26.4 | | 70 | | 80.5+/-25.3 | | 0.16 | |
| ***Simple Knee Value*** |  |  |  | |  | |  | |  | |
| *Pre-operative* |  | - | - | | - | | - | | - | |
| *1 year’s PO* |  | 62 | 86.7+/-16.3 | | 69 | | 88.8+/-14.5 | | 0.74 | |
