# Supplementary material
Source: Research Square preprint supplement (doi:10.21203/rs.3.rs-9226681/v1)
Supplement: Supplementary file 2 [file 4d3a974d58ae6bcabe72e2fb.docx]

**Table 2. Functional Alignment TKA.**

|  | Limits |
| --- | --- |
| Coronal limits |  |
| HKA | 2° valgus to 5° varus |
| Femoral component | 2° valgus to 2° valgus |
| Tibial component | 2°valgus to 3° varus |
| Sagittal limits |  |
| Femoral flexion | 0° to 5° |
| Tibial slope | 0° to 3° |
| Combined component flexion | Maximal 8° |
| Femoral rotation from surgical TEA | 0° IR to 7° ER |
| Gap balancing |  |
| Extension (mm) | Lateral-medial ≤ 1 |
| Flexion (mm) | Lateral-medial ≤ 4 |
| Medial compartment (mm) | Flexion-extension ≤ 1 |
